# Supplementary material
Source: publisher figshare collection journal article supplement (https://acs.figshare.com/ndownloader/files/4446997)
Supplement: Supplementary file 1 [file 4446997]

# Supporting Information

## **A 1*H*-Benzoimidazole Derivative as an *n*-Type Dopant and Its Use to Enable Air-Stable Solution-Processed *n*-Channel Organic Thin-Film Transistors**

Peng Wei,<sup>1</sup> Joon Hak Oh,<sup>1</sup> Guifang Dong,<sup>1,2</sup> Zhenan Bao\*,<sup>1</sup>

<sup>1</sup> Department of Chemical Engineering, Stanford University, Stanford, California 94305

<sup>2</sup> Department of Chemistry, Tsinghua University, Beijing 100084, P. R. China

## Chemicals

[6,6]-phenyl C<sub>61</sub> butyric acid methyl ester (PCBM) was purchased from Nano-C. (4-(1,3-dimethyl-2,3-dihydro-1*H*-benzoimidazole-2-yl)-phenyl)-dimethyl-amine (N-DMBI) was purchased from Sigma-Aldrich. 1,2,3-Trimethyl-2-phenyl-2,3-dihydro-1*H*-benzoimidazole (TMBI) was purchased from ChemBridge Corporation. Divinyltetramethyldisiloxane bis(benzocyclobutene) (BCB) was purchased from Dow Chemicals. The remaining chemicals and solvents were purchased from Sigma-Aldrich. All of the chemicals were used as received without further purification.

## Instruments

A Digital Instruments (DI) MMAFM-2 scanning probe microscope was used to perform tapping mode AFM on the samples with a silicon tip of 300 kHz frequency. DI Nanoscope software was used to process the raw AFM images. UV/VIS/NIR was recorded with a Varian Cary 6000i UV-vis spectrophotometer in ambient condition. All electrical measurements were measured with a Keithley 4200 semiconductor parameter analyzer. All devices were measured without encapsulation.

## Discussion On the Doping Mechanism

1,3-Dimethyl-2-phenyl-2,3-dihydro-1*H*-benzoimidazole (DMBI) derivatives have been reported as effective reagents for reductive transformations of organic compounds. They are also known to promote radical reactions, where they act as hydrogen donor and/or electron transfer reagents.<sup>1,2</sup> Among DMBI derivatives, DMBI was already widely studied and utilized as a reducing reagent for carbonyl compounds in organic synthesis.<sup>1</sup> For example, at  $^{\circ}\text{C}$   $\alpha$ -haloacetophenones can be reduced by DMBI to their corresponding carbonyl compounds.<sup>1b</sup> Because the neutral radicals of DMBI derivatives are highly reactive, direct detection and characterization by electron paramagnetic resonance (EPR) spectroscopy was not possible, as reported in previous publications.<sup>2,3</sup> However, in the reported references,<sup>1</sup> the mechanism of the reduction reactions by DMBI derivatives was proved to be a radical process by the addition of radical initiators or radical inhibitors. Zhu X. Q. et al. also systematically studied the enthalpy changes and

energy levels of DMBI derivatives.<sup>2</sup> Their results indicated that N-DMBI can form radicals similar to DMBI, although there is no report on reduction reactions of N-DMBI.

In the N-DMBI doped PCBM system, we hypothesize N-DMBI neutral radicals formed by heating in a N<sub>2</sub>-filled glovebox. This neutral radical has extremely high singly occupied molecular orbital level (SOMO, -2.36 eV by Gaussian 03' calculation) so that an electron can be immediately transferred to the lowest unoccupied molecular orbital (LUMO) of PCBM (Figure S1), leading to the formation of a stable N-DMBI cation. Therefore, PCBM is reduced by electron transfer from the neutral radicals of N-DMBI. This was proved by the observation of the PCBM radical anion absorption band over 800~1100 nm in vis-NIR (Figure S4).

Moreover, to have a better understanding of the doping mechanism of N-DMBI, we used TMBI to replace N-DMBI, where the hydrogen at imidazole core was replaced with a methyl group (Figure 1a) so that the neutral radicals cannot be easily formed as N-DMBI with hydrogen abstraction process. In our experiments, we indeed could not observe an obvious *n*-type doping effect, which is consistent with our hypothesis on the doping mechanism.

The systematical studies are underway to make a better understanding on the doping mechanism.

#### **Full Reference Citation for Ref. 12 in the Communication**

(12) Frisch, M. J.; Trucks, G. W.; Schlegel, H. B.; Scuseria, G. E.; Robb, M. A.; Cheeseman, J. R.; Montgomery, J. A. Jr; Vreven, T.; Kudin, K. N.; Burant, J. C.; Millam, J. M.; Iyengar, S. S.; Tomasi, J.; Barone, V.; Mennucci, B.; Cossi, M.; Scalmani, G.; Rega, N.; Petersson, G. A.; Nakatsuji, H.; Hada, M.; Ehara, M.; Toyota, K.; Fukuda, R.; Hasegawa, J.; Ishida, M.; Nakajima, T.; Honda, Y.; Kitao, O.; Nakai, H.; Klene, M.; Li, X.; Knox, J. E.; Hratchian, J. P.; Cross, J. B.; Adamo, C.; Jaramillo, J.; Gomperts, R.; Stratmann, R. E.; Yazyev, O.; Austin, A. J.; Cammi, R.; Pomelli, C.; Ochterski, J. W.; Ayala, P. Y.; Morokuma, K.; Voth, G. A.; Salvador, P.; Dannenberg, J. J.; Zakrzewski, V. G.; Dapprich, S.; Daniels, A. D.; Strain, M. C.; Farkas, O.; Nalick, D. K.; Rabuck, A. D.; Raghavachari, J.; Foresman, J. B.; Ortiz, J. V.; Cui, Q.; Baboul, G.; Clifford, S.;

Cioslowski, J.; Stefanov, B. B.; Liu, G.; Liashenko, A.; Piskorz, P.; Komaromi, I.; Martin, R. L.; Fox, D. A.; Keith, T.; Al-Laham, M. A.; Peng, C. Y.; Nanayakkara, A.; Challacombe, M.; Gill, P. M. W.; Johnson, B.; Chen, W.; Wong, M. W.; Gonzalez, C.; Pople, J. A. *Gaussian 03*, Gaussian, Inc.: Pittsburgh, PA, 2003.

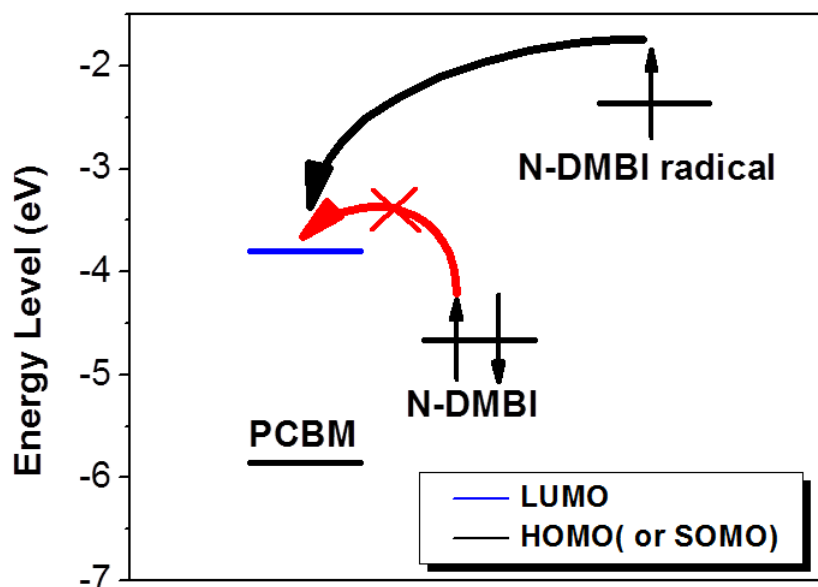

**Figure S1.** Energy diagram of PCBM, N-DMBI and N-DMBI neutral radical. The SOMO level of N-DMBI neutral radical was calculated by Gaussian 03’.

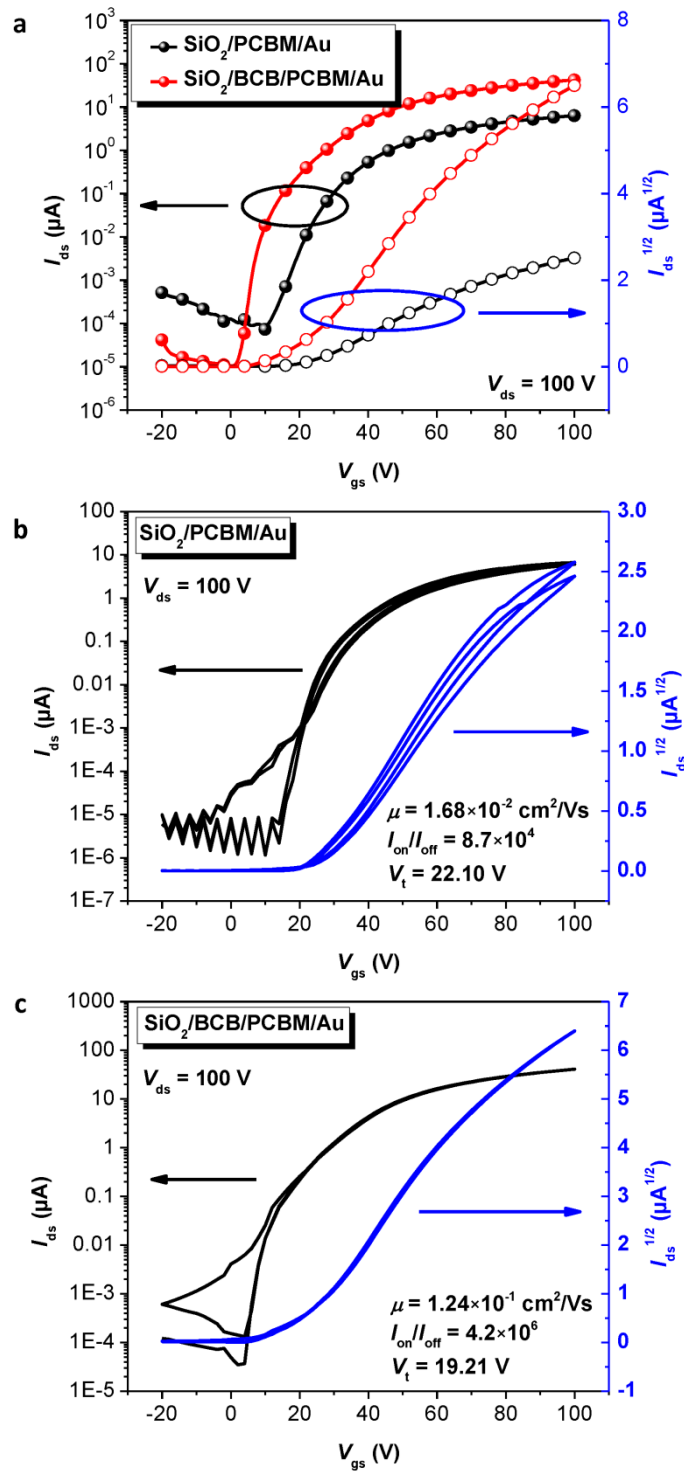

**Figure S2.** Comparison of the transfer ( $V_{ds} = 100$  V) and hysteresis characteristics with/without the hydroxyl-free BCB interlayer for PCBM OTFTs in a  $\text{N}_2$ -filled glovebox.

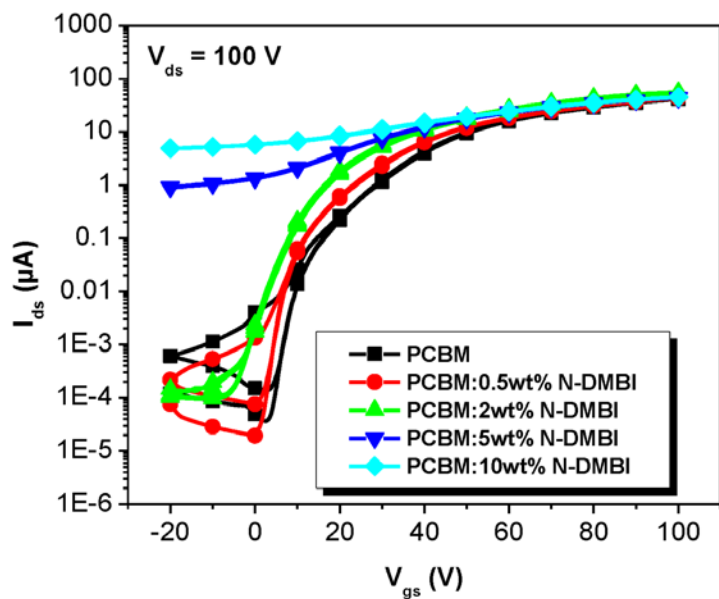

**Figure S3.** Hysteresis characteristics of the undoped and N-DMBI doped PCBM transistors at different doping concentrations in a N<sub>2</sub>-filled glovebox.

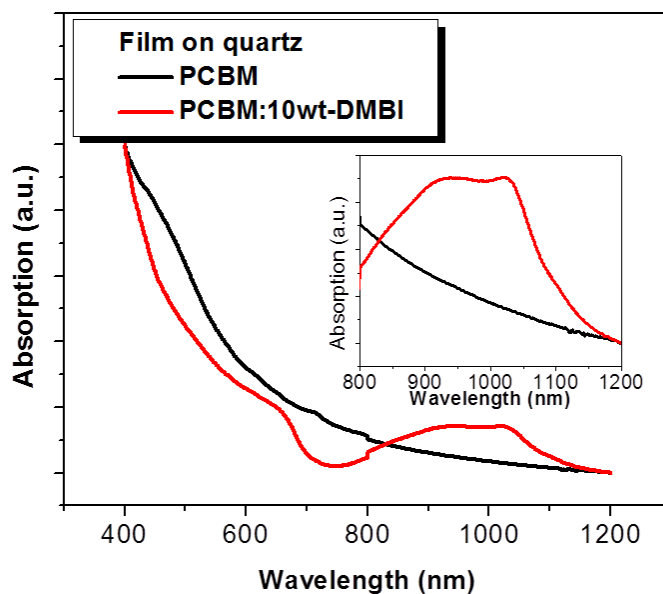

**Figure S4.** Vis/NIR absorption spectra of the thin films of undoped PCBM and 10wt% N-DMBI doped PCBM measured in ambient condition within 5 min exposure to air from a N<sub>2</sub>-filled glovebox. The inset shows the comparison of NIR absorption spectra with undoped PCBM and 10wt% N-DMBI doped PCBM films.

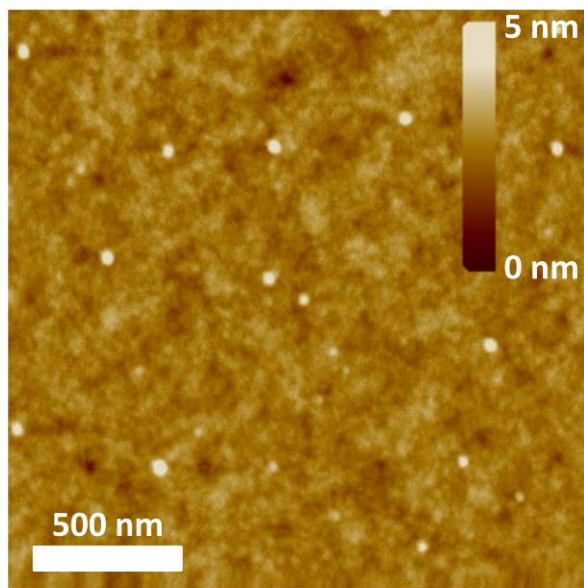

**Figure S5.** AFM image of 0.5wt% N-DMBI doped PCBM film.

**Table S1.** OTFT electrical properties for undoped, N-DMBI and TMBI doped PCBM transistors at different doping concentrations measured in the N<sub>2</sub>-filled glovebox. The calculated mobilities at high doping concentrations (5wt% and 10wt% N-DMBI doping) are lower as the devices are almost completely conductive and the on-off ratios are lower than 100.

|                   | Glovebox                      |                    |           |
|-------------------|-------------------------------|--------------------|-----------|
|                   | $\mu^a$ (cm <sup>2</sup> /Vs) | $I_{on}/I_{off}$   | $V_t$ (V) |
| PCBM              | $1.25 \times 10^{-1}$         | $4.67 \times 10^6$ | 19.10     |
| PCBM:0.5wt%N-DMBI | $1.18 \times 10^{-1}$         | $2.73 \times 10^6$ | 13.73     |
| PCBM:2wt%N-DMBI   | $1.02 \times 10^{-1}$         | $4.77 \times 10^5$ | 6.43      |
| PCBM:5wt%N-DMBI   | $6.47 \times 10^{-2}$         | $4.33 \times 10^1$ | -15.60    |
| PCBM:10wt%N-DMBI  | $3.82 \times 10^{-2}$         | $9.20 \times 10^0$ | -23.38    |
| PCBM:0.5wt%TMBI   | $1.07 \times 10^{-1}$         | $3.30 \times 10^6$ | 18.31     |

|                 |                       |                    |       |
|-----------------|-----------------------|--------------------|-------|
| PCBM:2wt% TMBI  | $1.22 \times 10^{-1}$ | $5.27 \times 10^6$ | 26.76 |
| PCBM:5wt% TMBI  | $1.04 \times 10^{-1}$ | $4.80 \times 10^6$ | 22.57 |
| PCBM:10wt% TMBI | $0.81 \times 10^{-1}$ | $4.01 \times 10^6$ | 19.94 |

---

a, All the data are the average of at least 3 devices.

## References:

- (1) (a) Chen, J.; Tanner, D. D. *J. Org. Chem.* **1988**, *53*, 3897. (b) Tanner, D. D.; Chen, J. *J. Org. Chem.* **1989**, *54*, 3842. (c) Tanner, D. D.; Chen, J. J.; Chen, L.; Luelo, C. *J. Am. Chem. Soc.* **1991**, *113*, 8074. (d) Hasegawa, E.; Hirose, H.; Sasaki, K.; Takizawa, S.; Seida, T.; Chiba, N. *Heterocycles* **2009**, *77*, 1147.
- (2) Zhu, X. Q.; Zhang, M. T.; Yu, A.; Wang, C. H.; Cheng, J. P. *J. Am. Chem. Soc.* **2008**, *130*, 2501.
- (3) Morkovnik, A. S.; Klimov, E. S.; Suslov, A. N.; Ivakhnenko, E. P.; Okhlobystin, O. Y.; Tertov, B. A. *Chem. Heterocyc. Compd.* **1987**, *23*, 525.
